# Supplementary material for: Compost-Derived Bacterial Communities Offer Promise as Organic Biocontrol Agents against Meloidogyne javanica and Promote Plant Growth in Tomato
Source: Preprints.org preprint supplement (doi:10.20944/preprints202403.0283.v1), 2024-03-05
Supplement: Supplementary file 1 [file supplementary]

## Sheet: Sheet1
Table S1: List of bacterial isolates composing the synthetic communities (SynComs)
SynCom1 (Rhizosphere)	SynCom2 (Bacilli)
A. tumefaciens 2Ba4	B. chandigarhensis 3Ba3
B. endophyticus 1Ba2	B. endophyticus 1Ba2
B. humi 3Ba30	B. endophyticus 3Ba21
B. licheniformis 3Ba17	B. humi 1Ba28
B. licheniformis 3Ba9	B. humi 1Ba43
B. firmus 2Ba55	B. humi 3Ba30
B. firmus 2Ba2	B. licheniformis 1Ba18
B. niacini 1Ba10	B. licheniformis 3Ba16
Bacillus sp. 2Ba43	B. licheniformis 3Ba17
Chryseobacterium sp. 2Ba19	B. licheniformis 3Ba20
C. wanjuense 2Ba46s	B. licheniformis 3Ba28
E. cloacae 2Ba30	B. licheniformis 3Ba44
L. mephitis 1Ba33	B. licheniformis 3Ba45
M. foliorum 1Ba13	B. licheniformis 3Ba46
M. foliorum 2Ba37	B. licheniformis 3Ba9
Microbacterium sp. 1Ba51	B. megaterium 1Ba20
M. esteraromaticum 3Ba33	B. subtilis 1Ba19
Ochrobactrum sp. 2Ba42	B. subtilis 2Ba19s
Ochrobactrum sp. 2Ba51	B. subtilis CCS
P. anguilliseptica 1Ba3	B. circulans 1Ba46
P. putida 3Ba4	B. firmus 2Ba55
S. maltophilia 1Ba16	B. foraminis 1Ba49
S. maltophilia 2Ba27	B. niacini 1Ba10
S. maltophilia 2Ba50	Bacillus sp. 2Ba43
S. maltophilia 2Ba32	Bacillus sp. 3Ba35
